# Supplementary material for: Expression of S100A4, ephrin-A1 and osteopontin in non-small cell lung cancer
Source: PubMed Central journal article supplement (PMC3458900; doi:10.1186/1471-2407-12-333), 2012-08-01
Supplement: 1471-2407-12-333-S1.pdf [file 1471-2407-12-333-S1.pdf]

**Additional file 1**

**Associations between clinicopathological parameters and expression of S100A4, ephrin-A1 and osteopontin**

| Parameter       |                 | Patients |         | S100A4c | S100A4n | Ephrin A1 | Osteopontin |
|-----------------|-----------------|----------|---------|---------|---------|-----------|-------------|
|                 |                 | Number   | Percent | p value | p value | p value   | p value     |
| Gender          | Male            | 116      | 53      | 0.95    | 0.62    | 0.59      | 0.15        |
|                 | Female          | 101      | 47      |         |         |           |             |
| Age at surgery  | < 65 years      | 100      | 46      | 0.28    | 0.38    | 0.39      | 0.44        |
|                 | > 65 years      | 117      | 54      |         |         |           |             |
| Differentiation | G1              | 18       | 9       | 0.05    | 0.12    | 0.14      | 0.80        |
|                 | G2              | 138      | 69      |         |         |           |             |
|                 | G3              | 45       | 22      |         |         |           |             |
|                 | Missing         | 16       |         |         |         |           |             |
| pTNM            | I               | 135      | 63      | 0.37    | 0.32    | 0.40      | 0.37        |
|                 | II              | 42       | 19      |         |         |           |             |
|                 | III             | 35       | 19      |         |         |           |             |
|                 | IV              | 4        | 2       |         |         |           |             |
|                 | Missing         | 1        |         |         |         |           |             |
| pT              | pT1             | 68       | 31      | 0.76    | 0.30    | 0.45      | 0.73        |
|                 | pT2             | 120      | 56      |         |         |           |             |
|                 | pT3             | 17       | 8       |         |         |           |             |
|                 | pT4             | 11       | 5       |         |         |           |             |
|                 | Missing         | 1        |         |         |         |           |             |
| pN              | 0               | 157      | 73      | 0.32    | 0.32    | 0.71      | 0.37        |
|                 | 1               | 38       | 17      |         |         |           |             |
|                 | 2               | 21       | 10      |         |         |           |             |
|                 | Missing         | 1        |         |         |         |           |             |
| Tumor size      | ≤ 3.0 cm        | 120      | 56      | 0.01    | 0.03    | 0.76      | 0.49        |
|                 | ≥ 3.1 cm        | 96       | 44      |         |         |           |             |
|                 | Missing         | 1        |         |         |         |           |             |
| Surgery         | Lobectomy       | 147      | 68      | 0.38    | 0.30    | 0.41      | 0.59        |
|                 | Pulmectomy      | 26       | 12      |         |         |           |             |
|                 | Wedge resection | 17       | 8       |         |         |           |             |
|                 | Bilobectomy     | 17       | 8       |         |         |           |             |
|                 | Other           | 10       | 4       |         |         |           |             |
| Tobacco use     | Current smoker  | 74       | 34      | 0.22    | 0.33    | 0.67      | 0.86        |
|                 | Former smoker   | 129      | 60      |         |         |           |             |
|                 | Never smoker    | 14       | 6       |         |         |           |             |
| Packyears       | 0               | 14       | 7       | 0.13    | 0.43    | 0.88      | 0.42        |
|                 | 1-5             | 4        | 2       |         |         |           |             |
|                 | 6-20            | 39       | 18      |         |         |           |             |
|                 | 21-40           | 105      | 48      |         |         |           |             |
|                 | 41-60           | 42       | 19      |         |         |           |             |
|                 | > 60            | 13       | 6       |         |         |           |             |
