# Supplementary material for: Expression of S100A4, ephrin-A1 and osteopontin in non-small cell lung cancer
Source: PubMed Central journal article supplement (PMC3458900; doi:10.1186/1471-2407-12-333), 2012-08-01
Supplement: 1471-2407-12-333-S2.pdf [file 1471-2407-12-333-S2.pdf]

## Additional file 2

### Associations between immunohistochemical expression of cytoplasmic and nuclear S100A4 and selected clinicopathological parameters in adenocarcinomas

|                 |         | S100A4c |          |          |        | S100A4n |          |      |          |        |      |
|-----------------|---------|---------|----------|----------|--------|---------|----------|------|----------|--------|------|
|                 |         | Number  | Neg/weak | Moderate | Strong | p       | Negative | Weak | Moderate | Strong | p    |
| All cases       |         | 123     | %        | %        | %      |         | %        | %    | %        | %      |      |
| pT stage        | pT1     | 41      | 25       | 39       | 37     |         | 7        | 22   | 34       | 37     |      |
|                 | pT2     | 64      | 42       | 31       | 27     |         | 14       | 41   | 20       | 25     |      |
|                 | pT3     | 9       | 33       | 45       | 22     |         | 22       | 11   | 45       | 22     |      |
|                 | pT4     | 9       | 22       | 56       | 22     | 0.36    | 22       | 45   | 11       | 22     | 0.04 |
| pN stage        | pN0     | 91      | 27       | 41       | 32     |         | 9        | 33   | 26       | 32     |      |
|                 | pN1     | 19      | 47       | 37       | 16     |         | 16       | 37   | 36       | 11     |      |
|                 | pN2     | 13      | 61       | 8        | 31     | 0.04    | 38       | 23   | 8        | 31     | 0.04 |
| pTNM            | I       | 76      | 26       | 41       | 33     |         | 8        | 32   | 27       | 33     |      |
|                 | II      | 21      | 43       | 33       | 24     |         | 10       | 33   | 38       | 19     |      |
|                 | III     | 23      | 48       | 30       | 22     |         | 30       | 35   | 13       | 22     |      |
|                 | IV      | 3       | 67       | 0        | 33     | 0.04    | 33       | 33   | 0        | 34     | 0.01 |
| Tumor size (cm) | < 2.0   | 36      | 25       | 47       | 28     |         | 14       | 30   | 28       | 28     |      |
|                 | 2.1-3.0 | 44      | 27       | 32       | 41     |         | 11       | 25   | 25       | 39     |      |
|                 | 3.1-5.0 | 34      | 44       | 32       | 24     |         | 17       | 32   | 27       | 24     |      |
|                 | 5.1-7.0 | 6       | 83       | 17       | 0      |         | 0        | 100  | 0        | 0      |      |
|                 | >7.0    | 3       | 33       | 67       | 0      | 0.02    | 0        | 33   | 67       | 0      | 0.23 |
| Packyears       | 0       | 12      | 50       | 42       | 8      |         | 25       | 42   | 33       | 0      |      |
|                 | 1-5     | 3       | 67       | 0        | 33     |         | 33       | 33   | 0        | 34     |      |
|                 | 6-20    | 24      | 50       | 33       | 17     |         | 17       | 41   | 25       | 17     |      |
|                 | 21-40   | 58      | 21       | 43       | 36     |         | 10       | 21   | 33       | 36     |      |
|                 | 41-60   | 21      | 43       | 28       | 29     |         | 10       | 48   | 14       | 28     |      |
|                 | > 60    | 5       | 20       | 20       | 60     | 0.02    | 0        | 40   | 0        | 60     | 0.01 |
